## EFFECTS OF EXTREME pH ON THE PHYSIOLOGY OF THE AUSTRALIAN ‘YABBY’ *CHERAX DESTRUCTOR*: ACUTE AND CHRONIC CHANGES IN HAEMOLYMPH OXYGEN LEVELS, OXYGEN CONSUMPTION AND METABOLITE LEVELS

BRONWYN A. ELLIS AND STEPHEN MORRIS

School of Biological Sciences, University of Sydney, Sydney, New South Wales 2006, Australia

Accepted 24 August 1994

### Summary

Respiration and metabolism of the freshwater crayfish *Cherax destructor* were investigated with respect to the acidification and alkalization of its environment. Crayfish were exposed for up to 504 h (21 days) to pH 4.5, pH 7.1 (control) or pH 8.0 water and oxygen consumption rate, haemolymph oxygen transport and haemolymph glucose and lactate concentrations were determined. The effect of reducing environmental  $[Ca^{2+}]$  in acid water from 500 to 50  $\mu\text{mol l}^{-1}$  was also examined.

In acid water (500  $\mu\text{mol l}^{-1}$   $Ca^{2+}$ ), oxygen uptake by *Cherax* was reduced by 79% after 504 h (21 days) compared with ‘control’ animals (pH 7.1, 500  $\mu\text{mol l}^{-1}$   $Ca^{2+}$ ). Haemolymph lactate concentration (mean 0.6  $\text{mmol l}^{-1}$ ) remained constant, indicating that anaerobiosis was not important, while glucose concentrations were regulated within the range of control values (0.32  $\pm$  0.01  $\text{mmol l}^{-1}$ ). The arterial-venous  $CO_2$  difference of *Cherax* haemolymph decreased after 288 h and  $PaO_2$  increased from 11.1  $\pm$  0.5 mmHg to 42.4  $\pm$  1.0 mmHg between 96 h and 288 h. Decreased oxygen uptake and delivery without compensatory increases in

anaerobiosis or glucose levels describe a hypometabolic response to low pH.

The hypometabolic response of *Cherax* was greater in alkaline water as shown by a 53% reduction in  $O_2$  uptake rate compared with a 44% reduction in acid-exposed (500  $\mu\text{mol l}^{-1}$   $Ca^{2+}$ ) animals after 96 h. This decrease in  $\dot{M}O_2$  of alkaline-exposed animals was correlated with decreased haemolymph glucose levels (from 0.32  $\pm$  0.01 at 0 h to 0.06  $\pm$  0.01  $\text{mmol l}^{-1}$  at 96 h).

Lowering the  $[Ca^{2+}]$  of the water both increased the magnitude of the effects of acid exposure and elicited further changes in haemolymph oxygen transport. The maintenance of high haemolymph  $P_{O_2}$  during pH stress appears to reduce the involvement of haemocyanin, since this promotes decreased a–v  $CO_2$ . Hypometabolism probably permits *Cherax* to conserve resources that might otherwise be used, however, for growth and reproduction. The implications for the fitness of the animal are discussed.

Key words: acid, alkali, oxygen, metabolic rate, hypometabolism, crayfish, *Cherax destructor*.

### Introduction

Variation in ambient pH is known to exert profound effects on ionoregulation and acid–base balance in decapod crustaceans, yet there is relatively little information on either metabolism or  $O_2$  transport. Consideration of the respiratory as well as the ionic and acid–base responses to extreme pH environments is pertinent, since branchial ionoregulatory mechanisms also affect gas exchange *via* acid–base balance ( $Na^+/H^+$ ,  $Cl^-/HCO_3^-$  or  $OH^-$ ) (Wheatly and McMahon, 1981). The effect of extreme pH on the acid–base and ion physiology of the Australian crayfish *Cherax destructor* has been investigated (Ellis and Morris, 1995). The investigation reported here considers the effects of extreme pH on oxygen uptake and metabolic status.

It has been proposed that acid and alkaline environments may increase energy expenditure for maintenance of homeostasis, which could subsequently reduce energy

available for growth and reproduction (e.g. Spaargaren, 1975; Neville, 1985; Mangum, 1986; Hargeby, 1990). In addition, low levels of calcium in the water may further increase the energy expenditure required for homeostasis (Wood and Rogano, 1986). Exposure of trout to pH 4.0 soft water, although impairing  $O_2$  transport, does not limit resting  $O_2$  consumption but reduces the scope for activity (Ye *et al.* 1991). More extreme acid conditions do impair resting  $O_2$  uptake, suggesting that an acidosis may actually reduce  $O_2$  consumption by direct action on metabolism at the tissue level.

The objectives of this study were, first, to determine the consequences of extreme environmental pH for the haemolymph  $O_2$  transport and delivery to the tissues in *Cherax destructor* and the requirement for anaerobiosis, thereby assessing to what extent acid or alkaline toxicity represents an energetically ‘expensive’ environment for this species. The

second aim was to determine whether  $[Ca^{2+}]$  plays an important role in modulating any effects of pH exposure on metabolism.

### Materials and methods

#### Experimental animals

Male and female *Cherax destructor* (45–60 g,  $N \approx 460$ ) were donated by the commercial crayfish farm Crayhaven situated in Karuah, New South Wales. The animals were maintained in a recirculating aquarium system at the University of Sydney. Details on crayfish origin and holding have been described previously (see Ellis and Morris, 1995). The animals were not fed for the duration of the experiments. Experiments were carried out using five different combinations of pH and  $[Ca^{2+}]$  (Table 1).

Animals to be used in the high- $Ca^{2+}$  experiments were acclimated for 1 week to water at pH 7.1 (treatment 1a) with the following salt composition (in  $\mu\text{mol l}^{-1}$ ): NaCl, 250; KCl, 500;  $CaCO_3$ , 500;  $MgCO_3$ , 200;  $MgSO_4$ , 500. This served as the control condition for the high- $Ca^{2+}$  treatments ( $500 \mu\text{mol l}^{-1}$ ). Animals to be used in the low- $Ca^{2+}$  experiments were acclimated for 1 week to  $Ca^{2+}$ -free water at pH 7.1 (treatment 2a) with a salt composition as follows (in  $\mu\text{mol l}^{-1}$ ): NaCl, 250; KCl, 500;  $Na_2CO_3$ , 500;  $MgCO_3$ , 200;  $MgSO_4$ , 500.

#### Haemolymph oxygen

The sampling protocol was as outlined previously (Ellis and Morris, 1995). Six different animals were used at each time and each was sampled only once to ensure the collection of independent data. The control series served partly as a check on the possible disturbing effects of reduced food supply and the brief movement and air exposure involved in the transfers. The crayfish showed no obvious increase in activity during transfer. According to the protocol, both arterial and venous haemolymph samples were collected from crayfish over a maximum period of 504 h of exposure to the five different treatment combinations shown in Table 1.

Animals in both the control condition (pH 7.1) and acid treatment (pH 4.5) containing  $500 \mu\text{mol l}^{-1} Ca^{2+}$  were monitored over a 504 h period, whilst the exposure times for those in the alkaline (treatment 3) and low- $Ca^{2+}$  treatment (treatment 2b) were 96 h and 288 h respectively.

Samples were immediately measured for oxygen partial pressure ( $P_{O_2}$ ) and content ( $C_{O_2}$ ). The haemolymph  $P_{O_2}$  was determined using a Radiometer electrode (type E5037/SI Radiometer, Copenhagen, Denmark) thermostatted at  $20^\circ\text{C}$  in a BMS3 blood microsystem connected to a PHM73 blood gas analyzer. The  $O_2$  content was measured using a Strathkelvin Instruments TC 500 Tucker cell (Tucker, 1967) as modified by Bridges *et al.* (1979) for haemocyanin.

#### Oxygen uptake

Animals were placed in separate jars (volume  $\approx 375$  ml) which served as respirometers. Mesh 'lids' allowed gas

Table 1. Details of experimental treatments

| Treatment | pH  | $[Ca^{2+}]$<br>( $\mu\text{mol l}^{-1}$ ) | N   |
|-----------|-----|-------------------------------------------|-----|
| 1a        | 7.1 | 500                                       | 120 |
| 2a        | 7.1 | 50                                        | 12  |
| 1b        | 4.5 | 500                                       | 120 |
| 2b        | 4.5 | 50                                        | 108 |
| 3         | 8.0 | 500                                       | 96  |

exchange with the surrounding water and prevented animal escape until respirometry was to be initiated. Animals were exposed to the appropriate treatment water for the required period, after which the mesh covers were replaced with a gas-tight lid for 0.25 h. Water samples were taken immediately before and after sealing the jars and the rates of  $O_2$  uptake were calculated from determinations of the change in  $P_{O_2}$  of each individual jar over 15 min. This method includes measurement of 'background' levels of  $M_{O_2}$  using jars containing only water. These background measurements were then subtracted from the experimental values. All water samples were introduced *via* capillary tubing into a thermostatted cell (D616, Radiometer, Copenhagen, Denmark) containing an oxygen electrode at the experimental temperature ( $20^\circ\text{C}$ ). The electrode was connected to an acid-base analyzer (PHM71) containing an oxygen module (PHA930). The rates were then expressed as mass-specific values.

#### Haemolymph glucose and lactate concentrations

Haemolymph glucose concentration was determined by spectrophotometry (Varian techtron, model 635) using the enzymatic glucose oxidase assay method (Sigma, procedure no. 510). Haemolymph glucose concentrations were calculated from regressions of  $\delta\text{Ab}/\delta[\text{glucose}]$  for the standards over the range  $0.03\text{--}0.28 \text{ mmol l}^{-1}$ .

To determine L-lactate concentrations,  $100 \mu\text{l}$  of 6% perchloric acid (PCA) was added to an equal volume of haemolymph to deproteinize the sample. After centrifugation,  $K_2CO_3$  ( $2.5 \text{ mol l}^{-1}$ ) was added to neutralize the remaining PCA and then samples were frozen ( $-15^\circ\text{C}$ ) until required for analysis. L-Lactate concentrations were determined, using  $25 \mu\text{l}$  of the deproteinized haemolymph, by the ultraviolet test method (Boehringer Mannheim). Absorbances were determined using a Pharmacia LKB Ultraspec III spectrophotometer interfaced with a 80286 computer system running BIOCHROM kinetics software, allowing correction for any constant drift due to interfering substances.

#### Data analysis

Data have been reported as mean  $\pm$  standard error unless otherwise stated. Two-way analyses of variance were used to detect differences between arterial and venous haemolymph and amongst treatments. The chosen limit of significance was  $P=0.05$ . *Post-hoc* testing was performed using Contrast testing and Tukey's HSD multiple means comparison test. All analyses were performed using the SYSTAT 5.01 statistical package.

## Results

## Haemolymph oxygen

Acid exposure:  $500 \mu\text{mol l}^{-1} \text{Ca}^{2+}$ 

The arterial and venous partial pressures of oxygen ( $P_{\text{aO}_2}$  and  $P_{\text{vO}_2}$  respectively) of *Cherax* held in neutral water both increased significantly at 0.5 h compared with the initial value ( $F_{9,46}=5.03$ ;  $F_{9,47}=8.41$ , Tukey) but promptly decreased back towards the initial values (Fig. 1A,B). Acid-exposed crayfish exhibited more pronounced increases in haemolymph  $P_{\text{O}_2}$  since both  $P_{\text{aO}_2}$  and  $P_{\text{vO}_2}$  were significantly higher than the initial value after 0.25 h, 288 h and 504 h ( $F_{9,47}=3.48$ , arterial;  $F_{9,47}=4.70$ , venous) and higher compared with the control animals after 0.25 h, 1 h, 288 h and 504 h ( $F_{8,90}=2.02$ , Contrast) (compare Fig. 1C,D with Fig. 1A,B).

In *Cherax* exposed to either neutral or acid water ( $500 \mu\text{mol l}^{-1} \text{Ca}^{2+}$ ), the initial increase in  $P_{\text{O}_2}$  was associated with a significantly decreased a-v difference ( $F_{9,40}=3.10$ ,  $F_{1,70}=5.01$  respectively, Tukey HSD) (Fig. 1A,C). The a-v  $P_{\text{O}_2}$  difference of the acid-exposed animals was significant only when the 288 h and 504 h values were excluded from the ANOVA, since the variance of these data and the apparently reversed a-v difference contributed substantially to the variance of the entire data set. The significance of the reversed a-v difference is difficult to determine since it occurs at a time of minimal oxygen demand (see below).

The arterial oxygen content ( $\text{CaO}_2$ ) of crayfish held in neutral water increased significantly only at 0.5 h with respect to the initial value ( $F_{9,47}=3.89$ , Tukey), but also promptly returned to initial values (Table 2). Crayfish in acid water had significantly

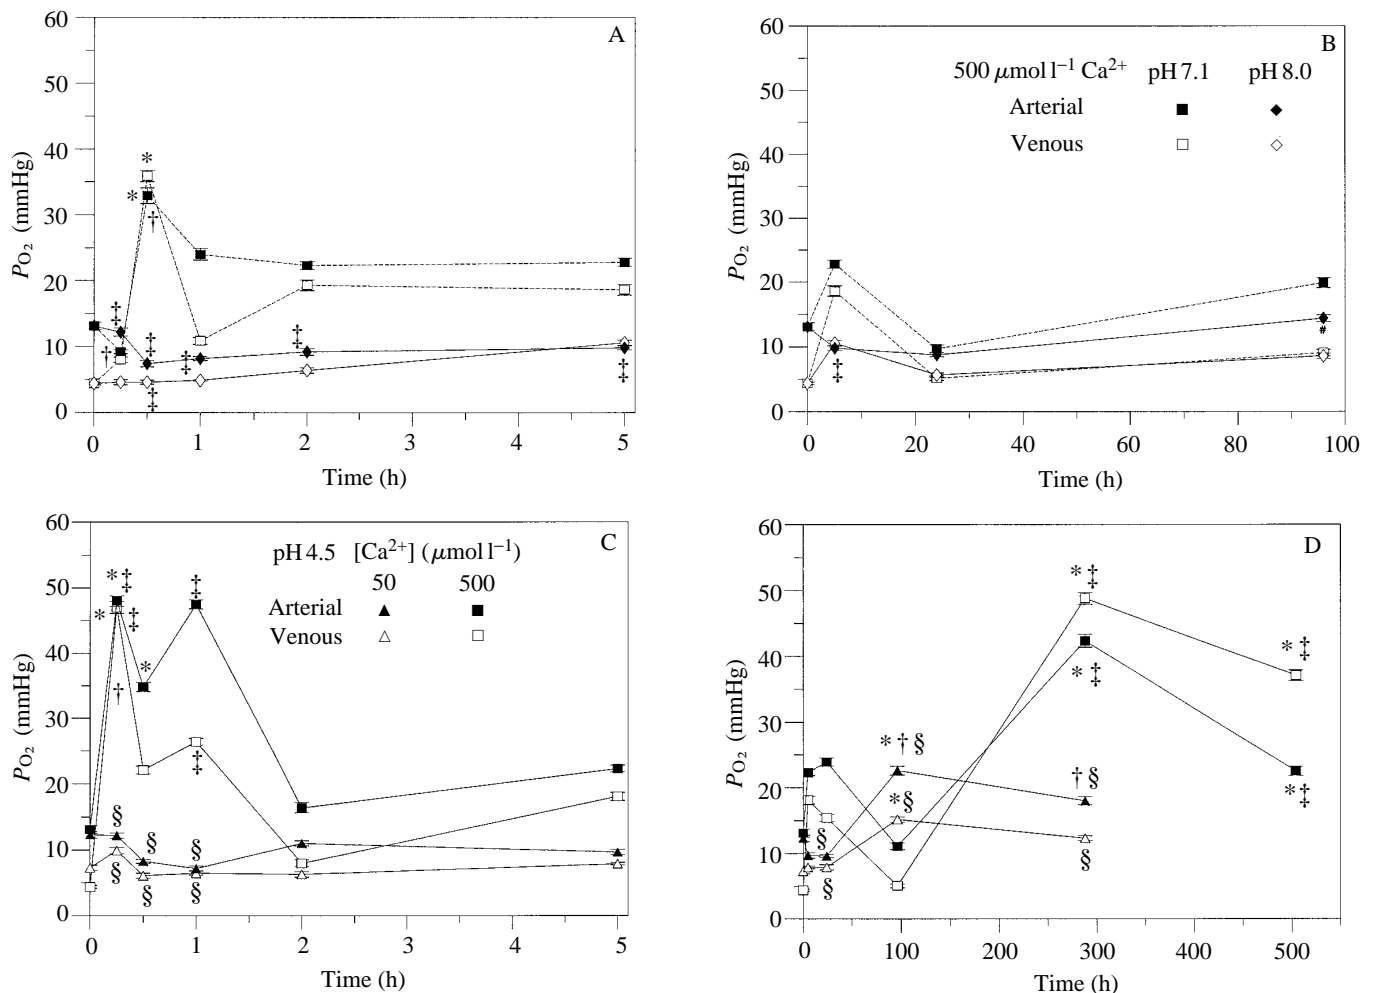

Fig. 1. Changes in the  $P_{\text{aO}_2}$  and  $P_{\text{vO}_2}$  of *Cherax destructor* placed in either neutral (pH 7.1,  $\square$ ,  $\blacksquare$  broken line) or alkaline (pH 8.0,  $\blacklozenge$ ,  $\diamond$ ) water ( $[\text{Ca}^{2+}]$  maintained at  $500 \mu\text{mol l}^{-1}$ ) are shown for (A) acute and (B) chronic exposures. The pre-exposure values are shown at 0 h. Results of exposure to acid water containing either  $50 \mu\text{mol l}^{-1}$  ( $\triangle$ ,  $\blacktriangle$ ) or  $500 \mu\text{mol l}^{-1}$   $\text{Ca}^{2+}$  ( $\square$ ,  $\blacksquare$ ) are shown for (C) acute and (D) chronic exposures. Note that the low- $\text{Ca}^{2+}$  acid-exposed crayfish were pre-acclimated to a low  $[\text{Ca}^{2+}]$  pH 7.1 condition (see text for details). \*Significantly different from the initial value, shown at 0 h; †significant change in arterial-venous difference compared with that at 0 h; ‡significant difference between  $P_{\text{aO}_2}$  and  $P_{\text{vO}_2}$  of animals held in extreme pH water compared with those held in neutral water; §significant difference between the  $P_{\text{aO}_2}$  or  $P_{\text{vO}_2}$  of animals held in pH 4.5,  $50 \mu\text{mol l}^{-1} \text{Ca}^{2+}$  water compared with those held in high- $\text{Ca}^{2+}$  acid water. The difference between the arterial and venous values at each sample time was significant for all treatments (two-way ANOVA). Values are means  $\pm$  S.E.M.,  $N=228$ .

Table 2.  $CO_2$  ( $mmol\ l^{-1}$ ) in the arterial and venous haemolymph of *Cherax destructor* during exposure to extreme pH in water containing  $500\ \mu mol\ l^{-1}$   $[Ca^{2+}]$ 

| Time<br>(h) | High $[Ca^{2+}]$ |           |              |            |            |           | Low $[Ca^{2+}]$ |            |
|-------------|------------------|-----------|--------------|------------|------------|-----------|-----------------|------------|
|             | pH 7.1           |           | pH 4.5       |            | pH 8.0     |           | pH 4.5          |            |
|             | Arterial         | Venous    | Arterial     | Venous     | Arterial   | Venous    | Arterial        | Venous     |
| 0.00        | 0.27±0.09        | 0.16±0.05 | 0.27±0.09    | 0.16±0.05  | 0.27±0.09  | 0.16±0.05 | 0.39±0.07§      | 0.29±0.07§ |
| 0.25        | 0.41±0.07        | 0.39±0.06 | 0.31±0.05    | 0.28±0.07  | 0.31±0.07  | 0.20±0.06 | 0.36±0.08       | 0.35±0.08  |
| 0.5         | 0.69±0.14*       | 0.31±0.07 | 0.23±0.05†   | 0.22±0.06  | 0.31±0.08† | 0.28±0.08 | 0.32±0.06       | 0.22±0.04  |
| 1           | 0.33±0.06        | 0.23±0.05 | 0.40±0.09*†  | 0.38±0.06* | 0.31±0.05  | 0.26±0.08 | 0.33±0.04§      | 0.25±0.07  |
| 2           | 0.19±0.03        | 0.18±0.04 | 0.30±0.08    | 0.19±0.04  | 0.30±0.04  | 0.21±0.06 | 0.39±0.03       | 0.23±0.05  |
| 5           | 0.20±0.05        | 0.17±0.03 | 0.19±0.04    | 0.15±0.03  | 0.26±0.06  | 0.19±0.06 | 0.27±0.07       | 0.18±0.00  |
| 24          | 0.21±0.05        | 0.21±0.05 | 0.35±0.08    | 0.18±0.04  | 0.24±0.04  | 0.21±0.06 | 0.25±0.06       | 0.22±0.05  |
| 96          | 0.20±0.05        | 0.14±0.04 | 0.26±0.07    | 0.13±0.03  | 0.30±0.04  | 0.27±0.07 | 0.28±0.04       | 0.23±0.05§ |
| 288         | 0.19±0.04        | 0.30±0.09 | 0.34±0.06*†‡ | 0.34±0.06  | –          | –         | 0.30±0.05       | 0.23±0.04§ |
| 504         | 0.30±0.08        | 0.24±0.04 | 0.25±0.03‡   | 0.27±0.08  | –          | –         | –               | –          |

The response of *Cherax* to acid water containing only  $50\ \mu mol\ l^{-1}$   $[Ca^{2+}]$  is also shown (S.E.M. shown for each time).

Statistical analyses were carried out to test for significant changes over time within each treatment (shown by \*), and for significant differences between treatments (†significantly different from pH 7.1,  $500\ \mu mol\ l^{-1}$   $[Ca^{2+}]$  treatment value; §significantly different from pH 4.5,  $500\ \mu mol\ l^{-1}$   $[Ca^{2+}]$  treatment value).

Two-way ANOVA showed that the difference between the arterial and venous values at each sample time was significant. Thus, ‡ indicates a significant change in the a–v difference compared with the initial value.

lower  $CaO_2$  compared with control animals (pH 7.1,  $[Ca^{2+}]=500\ \mu mol\ l^{-1}$ ) after 0.5 h, but higher  $CaO_2$  compared with the initial value and that measured in control animals after 288 h ( $F_{9,47}=3.05$ ;  $F_{8,87}=2.27$ ) (Table 2). The chronic increase in  $CaO_2$  after 288 h of exposure to pH 4.5 water ( $500\ \mu mol\ l^{-1}$   $Ca^{2+}$ ) was associated with a significantly smaller arterial–venous difference (effectively none) compared with the initial value ( $F_{9,100}=3.17$ ) (a–v difference 0.01 and 0.11  $mmol\ l^{-1}$  respectively).

#### Acid exposure: $50\ \mu mol\ l^{-1}$ $Ca^{2+}$

Lowering the  $[Ca^{2+}]$  of the acid water to  $50\ \mu mol\ l^{-1}$  significantly decreased the  $PaO_2$  and  $PvO_2$  below that of animals placed in high- $Ca^{2+}$  water between 0.25–1 h and 288 h ( $F_{8,90}=4.59$ ;  $F_{8,87}=13.85$ ) (Fig. 1C,D). It is interesting that lowering the  $[Ca^{2+}]$  of the acid water also accelerated the chronic increase in haemolymph  $P_{O_2}$  seen in acid-exposed animals after 288 h, to 96 h (cf. 50 and  $500\ \mu mol\ l^{-1}$   $Ca^{2+}$  acid treatments) ( $F_{8,44}=4.36$ , venous;  $F_{8,44}=4.28$ , arterial; Tukey) (Fig. 1D). The significant a–v  $P_{O_2}$  difference of *Cherax* in low- $Ca^{2+}$  acid water ( $F_{1,88}=10.52$ ) at this time also increased significantly ( $F_{8,36}=3.84$ , Tukey HSD).

Unlike animals held in high- $Ca^{2+}$  pH 4.5 water, animals exposed to low- $Ca^{2+}$  acid water exhibited an a–v  $CO_2$  difference that was maintained throughout the 12 day exposure period ( $F_{1,86}=28.94$ ) and there were no significant changes in either venous oxygen content ( $CvO_2$ ) or  $CaO_2$  over time ( $F_{8,42}=1.05$ ;  $F_{8,45}=1.80$ ). Lowering the  $[Ca^{2+}]$  of the water at pH 7.1 prior to acid exposure initially increased  $CaO_2$  and  $CvO_2$  significantly compared with those of animals held in high- $Ca^{2+}$  pH 7.1 water ( $F_{8,85}=3.02$ ;  $F_{8,87}=2.27$ , Contrast) (Table 2 at 0 h). Both  $CaO_2$  and  $CvO_2$  decreased significantly below those

in animals held in high- $Ca^{2+}$  water at various times over the 288 h exposure period ( $F_{8,85}=3.02$  arterial;  $F_{8,87}=2.27$  venous, Contrast) (Table 2).

#### Alkaline exposure

Unlike those crayfish in neutral and acid  $500\ \mu mol\ l^{-1}$   $Ca^{2+}$  water, an a–v  $P_{O_2}$  difference ( $F_{7,79}=18.40$ ) of crayfish exposed to pH 8.0 was maintained even after 96 h (Fig. 1A,B). Whilst the  $PvO_2$  of alkaline-exposed crayfish was only significantly lower than that of the control animals after 0.5 h ( $F_{6,67}=11.07$ , Contrast), the  $PaO_2$  values of animals in alkaline water were comparatively lower at almost all times ( $F_{1,70}=10.99$ ) (Fig. 1A,B).

There was a significant difference between the  $CaO_2$  and  $CvO_2$  ( $F_{1,78}=8.81$ ) which was maintained throughout the 96 h exposure period ( $F_{7,39}=0.37$ ) (Table 2). Animals held in alkaline water had significantly lower  $CaO_2$  values than animals in neutral water after 0.5 h ( $F_{6,68}=3.04$ , Contrast) (Table 2).

#### Oxygen uptake and anaerobiosis

##### Acid exposure

Animals held in acid water containing either  $500\ \mu mol\ l^{-1}$  or  $50\ \mu mol\ l^{-1}$   $Ca^{2+}$  had significantly lower  $O_2$  uptake rates ( $\dot{M}O_2$ ) than animals placed in neutral water ( $F_{2,117}=9.61$ , Tukey) (Fig. 2A,B). Whilst there were no significant changes over time in the  $\dot{M}O_2$  of ‘control’ crayfish placed in neutral pH water ( $500\ \mu mol\ l^{-1}$   $Ca^{2+}$ ) ( $F_{9,48}=3.64$ , Tukey), crayfish had significantly decreased  $\dot{M}O_2$  after 2 h, 24 h, 96 h and 504 h of exposure to acid high- $Ca^{2+}$  water compared with the initial value ( $F_{9,50}=5.83$ , Tukey). In fact, after 504 h (21 days), the rates for acid-exposed animals were only 25 % of those before the start of the experiment and were significantly reduced

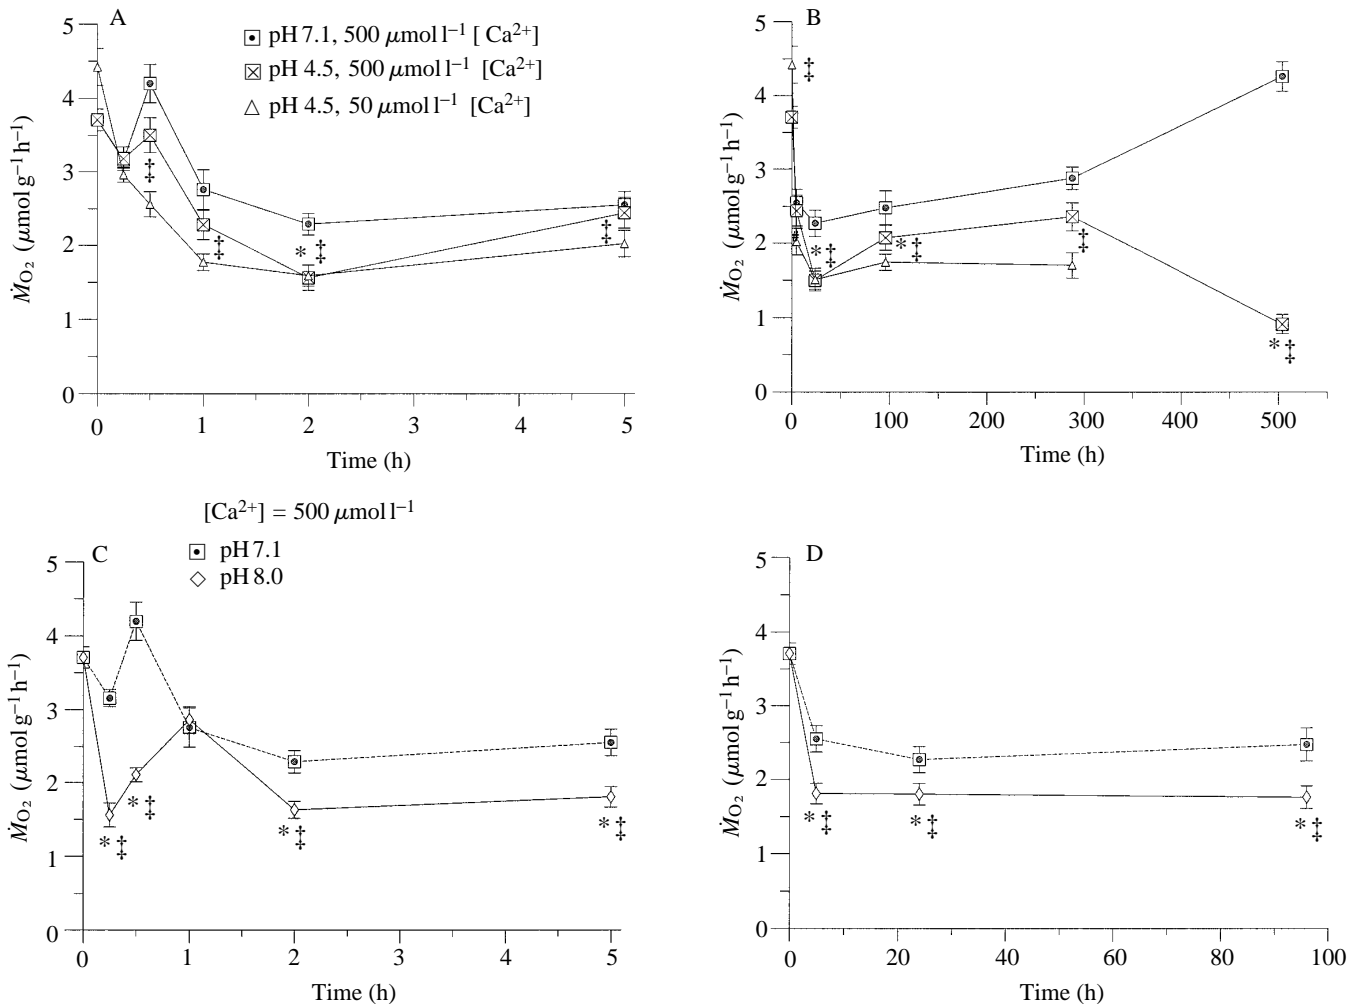

Fig. 2. Effects of pH and environmental  $[Ca^{2+}]$  concentrations on the respiratory gas exchange of *Cherax destructor*. The acute and chronic changes in  $\dot{M}O_2$  of *Cherax* held in either neutral water (pH 7.1 control,  $\square$ ) or pH 4.5 water ( $50 \mu\text{mol l}^{-1} Ca^{2+}$ ,  $\triangle$  compared with  $500 \mu\text{mol l}^{-1} Ca^{2+}$ ,  $\boxtimes$ ) are shown in A and B respectively. The initial value for the pH 7.1 condition is obscured under the  $\boxtimes$  symbol. \* denotes points significantly different from the initial value; ‡ denotes a significant decrease in the  $\dot{M}O_2$  of animals held in the acid-exposure treatment containing  $500 \mu\text{mol l}^{-1} Ca^{2+}$  compared with those held in pH 7.1,  $500 \mu\text{mol l}^{-1} Ca^{2+}$  water. The  $\dot{M}O_2$  of animals held in the  $50 \mu\text{mol l}^{-1} Ca^{2+}$  acid water decreased significantly at all times below the initial value (0 h). Acid exposure in  $50 \mu\text{mol l}^{-1} Ca^{2+}$  water significantly reduced the  $\dot{M}O_2$  below that of animals in pH 4.5 high- $Ca^{2+}$  water at all times over the 288 h treatment period, except at 0 h. The oxygen uptake rates ( $\dot{M}O_2$ ) of *Cherax destructor* held in pH 8.0 water containing a high  $[Ca^{2+}]$  ( $\diamond$ ) are compared with the control condition ( $\square$ , broken line in A and B). (C) Acute exposure; (D) chronic exposure. \* represents a significant change from the initial value; ‡ denotes a significant decrease in  $\dot{M}O_2$  of animals exposed to the alkaline treatment compared with those in control conditions. Values are means  $\pm$  S.E.M.,  $N=228$ .

compared with those of animals in the control condition ( $F_{8,88}=4.74$ , Contrast) (Fig. 2B).

Interestingly, lowering the  $[Ca^{2+}]$  of the acid water further significantly reduced  $\dot{M}O_2$  below the initial value after 0.25 h; it then remained low and significantly less than that of control animals up to 288 h ( $F_{8,44}=11.76$ , Tukey) (Fig. 2A,B).

The haemolymph lactate concentrations of acid-exposed crayfish ( $500 \mu\text{mol l}^{-1} Ca^{2+}$  water) were significantly depressed below those in the control animals in both the acute (0.5 h, 1 h, 5 h;  $F_{14,116}=1.94$ , Contrast) and chronic responses (504 h;  $F_{8,87}=2.04$ ) (Table 3).

Similarly, exposure of the crayfish to acid, low- $Ca^{2+}$  water (pH 4.5) significantly depressed anaerobic metabolism below

the lowest rate observed in animals from both the control condition after 0.5 h and 1 h ( $F_{14,116}=1.94$ , Contrast) and the high- $Ca^{2+}$  acid water (treatment 1b) during a 288 h exposure ( $F_{1,78}=5.76$ ) (Table 3), despite the already depressed haemolymph lactate concentrations recorded.

#### Alkaline exposure

*Cherax* held in alkaline water at pH 8.0 showed both significantly reduced  $\dot{M}O_2$  compared with the pre-exposure condition ( $F_{9,48}=3.64$ ) and considerably depressed  $\dot{M}O_2$  compared with those in control animals for almost the entire 96 h exposure period ( $F_{1,68}=21.86$ ) (Fig. 2C,D).

Lactate concentrations in animals exposed to pH 8.0 did not

Table 3. Lactate concentrations ( $\text{mmol l}^{-1}$ ) in the haemolymph of *Cherax destructor* during exposure to extreme pH in water containing  $500 \mu\text{mol l}^{-1} [\text{Ca}^{2+}]$ 

| Time (h) | High $[\text{Ca}^{2+}]$ |                          |                          | Low $[\text{Ca}^{2+}]$    |
|----------|-------------------------|--------------------------|--------------------------|---------------------------|
|          | pH 7.1                  | pH 4.5                   | pH 8.0                   | pH 4.5                    |
| 0.00     | 0.722±0.166             | 0.722±0.166 <sup>a</sup> | 0.722±0.166              | 0.280±0.139 <sup>a</sup>  |
| 0.25     | 1.032±0.186             | 1.082±0.191              | 0.518±0.094              | 0.317±0.076               |
| 0.50     | 1.294±0.153             | 0.523±0.110 <sup>†</sup> | 0.331±0.095 <sup>†</sup> | 0.752±0.200 <sup>§</sup>  |
| 1        | 0.910±0.133             | 0.280±0.119 <sup>†</sup> | 0.835±0.161              | 0.608±0.106* <sup>§</sup> |
| 2        | 0.963±0.127             | 0.545±0.117              | 1.023±0.164              | 0.575±0.144               |
| 5        | 1.697±0.231             | 0.503±0.123 <sup>†</sup> | 0.362±0.102 <sup>†</sup> | 0.213±0.089 <sup>§</sup>  |
| 24       | 0.560±0.109             | 0.597±0.113              | 0.380±0.111              | 0.272±0.084               |
| 96       | 0.633±0.111             | 0.760±0.168              | 1.283±0.186              | 0.187±0.059               |
| 288      | 1.483±0.197             | 0.523±0.133              |                          | 0.460±0.102               |
| 504      | 0.989±0.147             | 0.475±0.141 <sup>†</sup> |                          |                           |

The response of *Cherax* to acid water containing only  $50 \mu\text{mol l}^{-1} [\text{Ca}^{2+}]$  is also shown (S.E.M. shown for each time).

Statistical analyses were carried out to test for significant changes over time within each treatment, and for significant differences between treatments.

\* indicates a significant increase compared with  $t_0$ ; † indicates a significantly reduced [lactate] compared with animals held in the pH 7.1,  $500 \mu\text{mol l}^{-1} [\text{Ca}^{2+}]$  water at the specified sample time; § significantly different from pH 4.5,  $500 \mu\text{mol l}^{-1} [\text{Ca}^{2+}]$  treatment value.

<sup>a</sup> indicates the effect of low- $\text{Ca}^{2+}$  acclimation at neutral pH ( $t_0$ ) on the [lactate] of *Cherax*.

change over time with respect to the initial value, but were significantly below those in control animals after 0.5 h (mean 0.33 and  $1.29 \text{ mmol l}^{-1}$  respectively) and 5 h ( $F_{6,67}=2.90$ ) (Table 3).

#### Haemolymph glucose concentrations

##### Acid exposure

There was no significant change in the haemolymph glucose concentration of 'control' crayfish held in pH 7.1,  $500 \mu\text{mol l}^{-1} \text{Ca}^{2+}$  water ( $F_{9,49}=0.21$ ). Exposure to acid water (treatment 1b) produced a significant, but only transient, increase in haemolymph glucose concentration of *Cherax* between 1 h and 2 h compared with the initial value ( $F_{9,49}=4.67$ ) and with values for animals held in the control condition ( $F_{8,88}=2.69$ , Contrast) (Fig. 3A, inset). At all other times, even over the long term, glucose concentrations in animals exposed to acid and neutral water were essentially equivalent (Fig. 3A).

However, acclimation of *Cherax* to low- $\text{Ca}^{2+}$  neutral water (treatment 2b) significantly decreased the haemolymph glucose concentration compared with values for animals kept in the  $500 \mu\text{mol l}^{-1} \text{Ca}^{2+}$  pH 7.1 water (0 h mean  $0.15 \text{ mmol l}^{-1}$  and  $0.32 \text{ mmol l}^{-1}$  respectively). This trend to decrease continued up to 5 h ( $F_{8,86}=3.46$ , Contrast). Interestingly, at 24 h, the low- $\text{Ca}^{2+}$  acid water transiently but significantly increased the haemolymph glucose concentration of *Cherax* ( $F_{8,43}=3.75$ ), which then returned to within the range of initial values (Fig. 3A).

##### Alkaline exposure

Animals exposed to pH 8.0 water exhibited variable haemolymph glucose concentration, but the glucose concentration declined progressively and after 5 h was significantly below control levels (Fig. 3B). Consequently,

after 96 h, the haemolymph glucose concentration was significantly lower (mean  $0.06 \text{ mmol l}^{-1}$ ) than the initial value (0 h) (mean  $0.32 \text{ mmol l}^{-1}$ ) ( $F_{7,38}=2.32$ ).

## Discussion

### Environmental pH

#### Oxygen uptake and transport

Crustaceans completely at rest are occasionally referred to as 'sleeping' since they exhibit very low  $P_{\text{aO}_2}$  values, within the range 7–22 mmHg (Forgue *et al.* 1992). The transient increases in  $P_{\text{aO}_2}$  of *Cherax destructor* held in either acid or neutral  $500 \mu\text{mol l}^{-1} \text{Ca}^{2+}$  water during the first 0.25–1 h were, however, relatively small (35 and 20 mmHg respectively) and indicative of a classic 'startle' response. This conclusion was supported by a decreased  $P_{\text{CO}_2}$  (Ellis and Morris, 1995) and an apparent decrease in a–v  $\text{O}_2$  content difference. However, the absence of any decrease in  $\dot{M}_{\text{O}_2}$  or increase in haemolymph lactate suggests that any hypoxia and/or anaerobiosis is minor.

A similar increase in  $P_{\text{aO}_2}$  with low a–v content difference, after 288 h of acid exposure ( $500 \mu\text{mol l}^{-1} \text{Ca}^{2+}$ ) of *Cherax*, occurred without changes in haemolymph  $\text{CO}_2$  content or pH (Ellis and Morris, 1995). Furthermore, there were no increases in  $\dot{M}_{\text{O}_2}$  or circulating L-lactate concentration and thus there is no evidence for increased metabolic rate. Chronic exposure of *Cherax* to pH 4.5 water ( $500 \mu\text{mol l}^{-1} \text{Ca}^{2+}$ ) reduced extraction of  $\text{O}_2$  by the tissues from the haemolymph to effectively zero. Since  $\dot{M}_{\text{O}_2}$  decreased significantly both with exposure time and with respect to 'control' animals, concomitant with a real reduction in circulating lactate concentration, the animals were clearly hypometabolic with respect to crayfish in pH 7.1 water (cf. sleeping crayfish, Forgue *et al.* 1992).

Mild stress or sudden disturbance is often met by complete

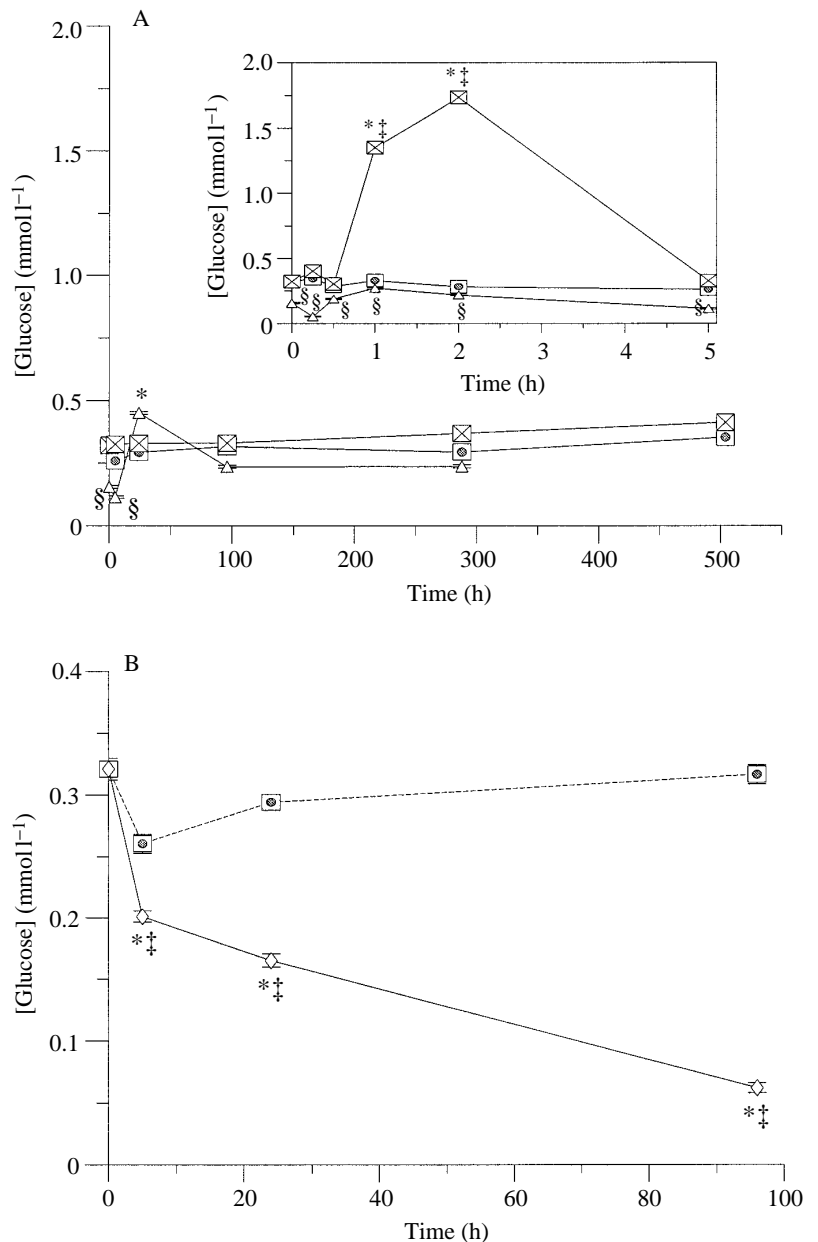

Fig. 3. Haemolymph glucose concentrations of *Cherax destructor* during a 504 h exposure to (A) high-Ca<sup>2+</sup> water at pH 7.1 (control, □) and pH 4.5 (⊠). Inset: the acute (5 h) response. The figures also demonstrate the effects of water hardness ([Ca<sup>2+</sup>]) on the haemolymph glucose concentrations during 5 h and 288 h exposures to low-Ca<sup>2+</sup> pH 4.5 water (△). Chronic effects of high-Ca<sup>2+</sup> alkaline water (◇, pH 8.0) on the haemolymph glucose concentrations of *Cherax destructor* compared with the control condition (as in A) are shown in B. Note the different y-axis scales used for A and B. \* represents a significant change from the initial value; ‡ represents a significant difference between the haemolymph glucose concentrations of animals held in extreme pH water (500 μmol l<sup>-1</sup> Ca<sup>2+</sup>) compared with crayfish held in neutral water; § indicates significantly lower haemolymph glucose concentrations of animals held in high-Ca<sup>2+</sup> water compared to low-Ca<sup>2+</sup> water. Error bars are sometimes obscured by the symbols. Values are means ± S.E.M., N=228.

O<sub>2</sub> saturation of the respiratory pigment (Piiper, 1986). Circulating Ca<sup>2+</sup> and L-lactate potentiate the O<sub>2</sub> affinity of *Cherax* haemocyanin ( $\Delta \log P_{50} / \Delta \log [\text{lactate}] = -0.12$ ,  $\Delta \log P_{50} / \Delta \log [\text{Ca}^{2+}] = -0.63$ ; S. Morris and J. Callaghan, in preparation) such that, over the pH range and the Ca<sup>2+</sup> and L-lactate concentration ranges in the haemolymph of pH-challenged animals, the  $P_{50}$  varied from 2.6 to 3.5 mmHg and the  $P_{95}$  from 6.2 to 8.1. Therefore, the increase in  $P_{aO_2}$  from 11.1 mmHg after 96 h to 42.4 mmHg after 288 h of acid exposure would encourage 100% haemocyanin O<sub>2</sub>-saturation (compare with acid-exposed *Astacus astacus*, which exhibit greater than 95% saturation, Jensen and Malte, 1990). Pigment saturation reduces the role of haemocyanin in O<sub>2</sub> transport (McMahon and Wilkens, 1983). Similarly, increased haemolymph pH and [Ca<sup>2+</sup>] in alkaline-exposed animals would increase oxygen affinity. Thus, in both acid- and alkaline-

exposed *Cherax*, relatively high O<sub>2</sub> affinity and elevated  $P_{O_2}$  of the haemolymph lead to reduced a-v O<sub>2</sub> content differences, which is quite different from the true 'quiescent' state (see Forgue *et al.* 1992). Unlike some crayfish species (e.g. *Procambarus clarkii*; Patterson and Defur, 1988), haemolymph pH may, *via* haemocyanin O<sub>2</sub>-affinity, be an important component of the hypometabolic response in *Cherax destructor*.

#### Effects of acid water on energy metabolism

At rest, respiratory gas exchange and transport are matched to the metabolic rate (Piiper, 1986). Acid soft water environments depressed the major aerobic and anaerobic metabolic pathways in *Cherax destructor* compared with those in similarly treated animals at pH 7.1 (i.e. not a starvation effect). The extent of this depression also depended on the

environmental calcium concentration. Facultative hypometabolism is often a mechanism for eluding harsh environmental conditions (e.g. Brooks and Storey, 1989; Storey, 1987). The 75% decrease in oxygen uptake rate (compared with 0h) of *Cherax* in high- $\text{Ca}^{2+}$  pH 4.5 water is comparable, for example, to 50–85% decreases in aestivating lungfish (Swan *et al.* 1968) and 85% decreases in diving turtles (Jackson, 1968). Metabolic depression may be maladaptive in part, since it seems that ion balance requiring ATP may be disrupted at a time when salt regulation is also challenged (Spaargaren, 1975; Mangum, 1986; Ellis and Morris, 1995).

Assuming that 1 mol of  $\text{O}_2$  taken up by the tissues produces 6.33 mol of ATP during aerobic metabolism (Herreid and Full, 1984), the mass-specific energy expenditure of *Cherax* over a 504 h (21 day) exposure is only  $7.5 \times 10^3$  mol of ATP in acid water compared with  $9.8 \times 10^3$  mol of ATP in neutral water, conserving  $2.3 \times 10^3$  mol of ATP. The hypometabolic state can therefore be viewed as a basic survival strategy (Storey, 1987), economizing on fuel reserves.

The measured 'resting' haemolymph glucose concentrations of *Cherax destructor* were within the 'normal' range ( $<0.56 \text{ mmol l}^{-1}$ ; Telford, 1975) and comparable with previously observed levels for *Cherax destructor* ( $0.22 \text{ mmol l}^{-1}$ ) (B. A. Ellis and S. Morris, unpublished data) and for other crayfish species (Telford, 1974). Elevation of haemolymph glucose concentration is a common response in decapods during stress (Telford, 1974) and up to tenfold increases have been recorded (Sedlmeier and Keller, 1981). The transient, yet considerable, hyperglycaemia in *Cherax* after 2 h in acid  $500 \mu\text{mol l}^{-1} \text{ Ca}^{2+}$  water ( $1.73 \text{ mmol l}^{-1}$ ) was higher than those observed in *Nephrops norvegicus* caused by handling and asphyxiation stresses ( $1.38 \text{ mmol l}^{-1}$ ) (Spicer *et al.* 1990) and in *Orconectes propinquus* during exposure to 2,4-dichlorophenol ( $0.68 \text{ mmol l}^{-1}$ ) (Telford, 1974).

An increased glucose concentration implies decreased glycolysis relative to glycogenolysis and would explain the almost immediate depression of aerobic metabolism in *Cherax* (within 2 h). The recovery of haemolymph glucose concentrations within 5 h (see Keller and Andrew, 1973) depends on achieving a new balance between glucose mobilisation, glucose utilisation and possibly glycogen synthesis. This biphasic pattern, characterized by an initial 'startle' and then a protracted phase, is common during environmental fluctuations (McMahon and Wilkens, 1983). Animals were noticeably 'lethargic' after 504 h (21 days) of exposure to acid water but not after a similar period in 'control' conditions (B. A. Ellis and S. Morris, personal observation). Thus, glucose mobilisation must ultimately slow to match reduced aerobic glycolysis, representing slowed flux, and therefore reduced scope for activity and perhaps even growth. Hypoactivity and cessation of feeding are common behaviour traits in fish during environmental acidification, especially in the pH range 4.5–4.75 (Peterson and Martin-Robichaud, 1983; Jones *et al.* 1985). Slower and less complete moult cycles of the crayfish *Orconectes rusticus* and *Astacus astacus* (France, 1981) in naturally acid waters support this suggestion.

Anaerobiosis requires significantly increased glycolysis, while lactate concentrations can potentially increase 40- to 60-fold in decapods during environmental stress (Tyler-Jones and Taylor, 1988; Van Aardt and Wolmarans, 1987; Lowery and Tate, 1986). In most crayfish species, acidification does not promote accumulation of lactate (e.g. Morgan and McMahon, 1982; *Astacus astacus*, Jensen and Malte, 1990). In *Cherax*, L-lactate concentrations did not increase (compared with the control condition) ( $F_{2,116}=11.333$ , Contrast), showing the animals to be aerobically competent but, together with decreased  $\dot{M}\text{O}_2$ , suggesting metabolic 'shut-down' (Storey, 1987).

#### *Effects of alkaline water on energy metabolism*

Alkaline water produced the most rapid and extensive depression of metabolism, as shown by the immediate and sustained depression of  $\dot{M}\text{O}_2$  and circulating [lactate]. Also, while *Cherax* exposed to pH 4.5 ( $500 \mu\text{mol l}^{-1} \text{ Ca}^{2+}$ ) showed a 'normal' stress-induced hyperglycaemia, alkaline exposure induced a progressive severe hypoglycaemia such that after 96 h haemolymph glucose concentration had fallen by 80%. Sustained imbalances in the rates of metabolic processes signify irreversible damage (Storey, 1988) and long-term survival may be unlikely.

#### *The effect of environmental calcium*

Low environmental calcium concentrations have been proposed to increase the energy expenditure required for homeostasis (McDonald and Milligan, 1988). Indeed, acclimation of *Cherax* to low- $\text{Ca}^{2+}$  water at neutral pH significantly increased  $\dot{M}\text{O}_2$ , consistent with decreased haemolymph glucose concentrations. However, haemolymph oxygen levels,  $\dot{M}\text{O}_2$  and haemolymph lactate levels provide strong evidence that lowering the  $[\text{Ca}^{2+}]$  of acid water from 500 to  $50 \mu\text{mol l}^{-1}$  both accelerates and amplifies the effects of acid exposure. This is supported by the 28% decrease in  $\dot{M}\text{O}_2$  of *Cherax* held in  $50 \mu\text{mol l}^{-1}$  water relative to that of animals in high- $\text{Ca}^{2+}$  acid water and the 62% decrease in  $\dot{M}\text{O}_2$  compared with the initial value at pH 7.1. The mechanism for such an exacerbation of metabolic depression during low- $\text{Ca}^{2+}$  acid exposure is unknown. This  $\text{Ca}^{2+}$  effect is important, since the  $[\text{Ca}^{2+}]$  of many natural water bodies and rivers is extremely low due to the binding of  $\text{Ca}^{2+}$  by humic acids produced in the soil (Hargeby, 1990).

*Cherax* held in acid ( $50 \mu\text{mol l}^{-1} \text{ Ca}^{2+}$ ) water had a surprisingly higher haemolymph pH and haemolymph  $\text{Ca}^{2+}$  concentration than animals held at neutral pH in water with ten times the amount of  $\text{Ca}^{2+}$  (see Ellis and Morris, 1995). These changes in haemolymph conditions during exposure to acid low- $\text{Ca}^{2+}$  water would cause a leftward shift of the  $\text{O}_2$  equilibrium curve, thereby explaining the higher  $\text{CvO}_2$  but quite similar  $P\text{O}_2$  values compared with those of crayfish in pH 7.1, high- $\text{Ca}^{2+}$  water (see McMahon and Wilkens, 1983). The mean a-v  $\text{CO}_2$  difference of crayfish during the 288 h of acid exposure was only  $0.07 \text{ mmol l}^{-1}$ . High  $\text{Ca}^{2+}$  concentration in acid water therefore probably acts by some mechanism to increase haemolymph  $P\text{O}_2$  and thus oxygenation.



To conclude, acid and alkaline waters are indeed challenging environments for *Cherax destructor* and probably reduce growth and fecundity, but do not promote increased energy expenditure for homeostasis (see Neville, 1985; Hargeby, 1990). It seems unlikely that the energy-conserving responses to extreme pH could form the basis of any long-term survival strategy, although clearly they would enable the animals to survive transient fluctuations in environmental pH. Given the increasing frequency with which such abnormal disturbances of the environment are occurring, considerable further studies of both the effect of extreme pH and the hypometabolic response are required.

We would like to thank Robert and Cheryl McCormack of Crayhaven Aquacultural Industries for the supply of animals during the study and Ms Agnieszka Adamczewska for her assistance in processing the haemolymph samples. This project was supported by a University of Sydney Research Grant and the Australian Research Council.

### References

- BRIDGES, C. R., BICUDO, J. E. R. W. AND LYKKEBOE, G. (1979). Oxygen content measurements in blood containing haemocyanin. *Comp. Biochem. Physiol.* **62**, 457–462.
- BROOKS, S. P. J. AND STOREY, K. B. (1989). Influence of hormones, second messengers and pH on the expression of metabolic responses to anoxia in a marine whelk. *J. exp. Biol.* **145**, 31–43.
- ELLIS, B. A. AND MORRIS, S. (1995). Effects of extreme pH on the physiology of the Australian 'yabby' *Cherax destructor*: acute and chronic changes in haemolymph carbon dioxide, acid–base and ionic status. *J. exp. Biol.* **198**, 395–407.
- FORGUE, J., TRUCHOT, J. P. AND MASSABUAU, J. C. (1992). Low arterial  $P_{O_2}$  in resting crustaceans is independent of blood oxygen-affinity. *J. exp. Biol.* **170**, 257–264.
- FRANCE, R. L. (1981). Responses of the crayfish *Orconectes virilis* to experimental acidification of a lake with special reference to the importance of calcium. In *Proceedings of the 5th International Symposium on Freshwater Crayfish*, Davis, CA (ed. C. R. Goldman), pp. 98–111. Westport, CT: AVI Publishing.
- HARGEBY, A. (1990). Effects of pH, humic substances and animal interactions on survival and physiological status of *Asellus aquaticus* (L.) and *Gammarus pulex* (L.). *Oecologia* **82**, 348–354.
- HERREID, C. F. AND FULL, R. J. (1984). Fiddler crab exercise: the energetic cost of running sideways. *J. exp. Biol.* **109**, 141–161.
- JACKSON, D. C. (1968). Metabolic depression and oxygen depletion in the diving turtle. *J. appl. Physiol.* **24**, 503–509.
- JENSEN, F. B. AND MALTE, H. (1990). Acid–base and electrolyte regulation and haemolymph gas transport in crayfish, *Astacus astacus*, exposed to soft, acid water with and without aluminium. *J. comp. Physiol.* **160B**, 483–490.
- JONES, K. A., HARA, T. J. AND SCHERER, E. (1985). Behavioural modifications in arctic char (*Salvelinus alpinus*) chronically exposed to sublethal pH. *Physiol. Zool.* **58**, 400–412.
- KELLER, R. AND ANDREW, E. M. (1973). The site of action of the crustacean hyperglycaemic hormone. *Gen. comp. Endocr.* **20**, 572–578.
- LOWERY, T. A. AND TATE, L. G. (1986). Effect of hypoxia on haemolymph lactate and behaviour of the blue crab *Callinectes sapidus* Rathbun in the laboratory and field. *Comp. Biochem. Physiol.* **85A**, 689–692.
- MANGUM, C. P. (1986). Osmoregulation in marine and estuarine animals: its influence on respiratory gas exchange and transport. *Boll. Zool.* **53**, 1–7.
- MCDONALD, D. G. AND MILLIGAN, C. L. (1988). Sodium transport in the brook trout, *Salvelinus fontinalis*: effects of prolonged low pH exposure in the presence and absence of aluminum. *Can. J. Fish. aquat. Sci.* **45**, 1606–1613.
- MCMAHON, B. R. AND WILKENS, J. L. (1983). Ventilation, perfusion and oxygen uptake. In *The Biology of the Crustacea*, vol. 5, *Internal Anatomy and Physiological Regulation* (ed. L. H. Mantel), pp. 287–297. New York: Academic Press.
- MORGAN, D. O. AND MCMAHON, B. R. (1982). Acid tolerance and effects of sublethal acid exposure on iono-regulation and acid–base status in two crayfish *Procambarus clarki* and *Orconectes rusticus*. *J. exp. Biol.* **97**, 241–252.
- NEVILLE, C. M. (1985). Physiological response of juvenile rainbow trout, *Salmo gairdneri*, to acid and aluminium – prediction of field responses from laboratory data. *Can. J. Fish. aquat. Sci.* **42**, 2009–2019.
- PATTERSON, N. E. AND DEFUR, P. L. (1988). Ventilatory and circulatory responses of the crayfish, *Procambarus clarkii*, to low environmental pH. *Physiol. Zool.* **61**, 396–406.
- PETERSON, R. H. AND MARTIN-ROBICHAUD, D. J. (1983). Embryo movements of Atlantic salmon (*Salmo salar*) as influenced by pH, temperature and state of development. *Can. J. Fish. aquat. Sci.* **40**, 777–782.
- PIPER, J. (1986). Gas exchange and acid–base status. In *Acid–base Regulation in Animals* (ed. N. Heisler). Amsterdam: Elsevier.
- SEDLMEIER, D. AND KELLER, R. (1981). The mode of action of the crustacean neurosecretory hyperglycaemic hormone. I. The initial survey. *Gen. comp. Endocr.* **21**, 554–564.
- SPAARGAREN, D. H. (1975). Energy relations in the ion regulation in three crustacean species. *Comp. Biochem. Physiol.* **51**, 543–548.
- SPICER, J. I., HILL, A. D., TAYLOR, A. C. AND STRANG, R. H. C. (1990). Effect of aerial exposure on concentrations of selected metabolites in blood of the Norwegian lobster *Nephrops norvegicus* (Crustacea: Nephropidae). *Mar. Biol.* **105**, 129–135.
- STOREY, K. B. (1987). Investigations of the mechanisms of glycolytic control during hibernation. *Can. J. Zool.* **65**, 3079–3083.
- STOREY, K. B. (1988). Suspended animation: the molecular basis of metabolic depression. *Can. J. Zool.* **66**, 124–132.
- SWAN, H., JENKINS, D. AND KNOX, K. (1968). Anti-metabolic extract from the brain of *Protopterus aethiopicus*. *Nature* **217**, 671.
- TELFORD, M. (1974). Blood glucose in crayfish. II. Variations induced by artificial stress. *Comp. Biochem. Physiol.* **48A**, 555–560.
- TELFORD, M. (1975). Blood glucose in crayfish. III. The source of glucose and role of the eyestalk factor in hyperglycaemia of *Cambarus robustus*. *Comp. Biochem. Physiol.* **51B**, 69–73.
- TUCKER, V. A. (1967). Methods for oxygen content and dissociation curves on microlitre blood samples. *J. appl. Physiol.* **23**, 410–414.
- TYLER-JONES, R. AND TAYLOR, E. W. (1988). Analysis of haemolymph and muscle acid–base status during aerial exposure in the crayfish *Austropotamobius pallipes*. *J. exp. Biol.* **134**, 409–422.
- VAN AARDT, W. J. AND WOLMARANS, T. (1987). Effects of anoxia on the haemolymph physiology and lactate concentrations in the freshwater crab *Potamon warreni* Calman. *Comp. Biochem. Physiol.* **88A**, 671–675.

- WHEATLY, M. G. AND MCMAHON, B. R. (1981). Respiration and ionoregulation in the euryhaline crayfish *Pacifastacus leniusculus* on exposure to high salinity: an overview. In *Proceedings of the 5th International Symposium on Freshwater Crayfish*, Davis, CA (ed. C. R. Goldman), pp. 98–111. Westport, CT: AVI Publishing.
- WOOD, C. M. AND ROGANO, M. S. (1986). Physiological responses to acid stress in crayfish (*Orconectes*): haemolymph ions, acid–base status and exchanges with the environment. *Can. J. Fish. aquat. Sci.* **43**, 1017–1026.
- YE, X., RANDALL, D. J. AND HE, X. (1991). The effect of acid water on oxygen consumption, circulating catecholamines and blood ionic and acid–base status in rainbow trout (*Salmo gairdneri*, Richardson). *Fish Physiol. Biochem.* **9**, 23–30.
